# Supplementary material for: Adaptor protein APPL1 links neuronal activity to chromatin remodeling in cultured hippocampal neurons
Source: PubMed Central journal article supplement (PMC8373263; doi:10.1093/jmcb/mjaa058), 2020-10-26
Supplement: mjaa058_supplementary_data.pdf [file mjaa058_supplementary_data.pdf]

1 **Supplementary Materials**

2  
3 **Adaptor protein APPL1 links neuronal activity to chromatin remodeling in**  
4 **cultured hippocampal neurons**

5 Yu Wu<sup>1</sup>, Xinyou Lv<sup>1</sup>, Haiting Wang<sup>1</sup>, Kai Qian<sup>1</sup>, Jinjun Ding<sup>1</sup>, Jiejie Wang<sup>1</sup>, Shushan  
6 Hua<sup>1</sup>, Tiancheng Sun<sup>1</sup>, Yiting Zhou<sup>3</sup>, Lina Yu<sup>1</sup>, and Shuang Qiu<sup>1,2\*</sup>

7  
8 <sup>1</sup>Department of Neurobiology and Department of Anesthesiology of Second Affiliated  
9 Hospital, Zhejiang University School of Medicine, Hangzhou 310058, China.

10 <sup>2</sup>NHC and CAMS Key Laboratory of Medical Neurobiology, MOE Frontier Science  
11 Center for Brain Research and Brain-Machine Integration, School of Brain Science  
12 and Brain Medicine, Zhejiang University, Hangzhou 310058, China.

13 <sup>3</sup>Department of Biochemistry and Department of Orthopaedic Surgery of the Second  
14 Affiliated Hospital, Zhejiang University School of Medicine, Hangzhou 310058, China.

15  
16 **\*To whom correspondence should be addressed: Dr. Shuang Qiu, E-mail:**  
17 [qiushly@zju.edu.cn](mailto:qiushly@zju.edu.cn) .

18 **The authors have no conflict of interest**

19 **Supplementary Material and Methods**

20 *Co-immunoprecipitation and Western Blot*

21 Co-immunoprecipitation (Co-IP) was carried out as reported previously (Qiu et al.,  
22 2014). Briefly, neurons were lysed in a radio-immunoprecipitation (RIPA) assay buffer  
23 [50 mM Tris-HCl (pH 7.4), 150 mM NaCl, 1% NP-40, 0.25% sodium deoxycholate, 2  
24 mM EDTA, 0.1mM PMSF], supplemented with phosphatase inhibitor cocktails 2 and 3.  
25 After centrifuged (12,000g, at 4°C) for 30 min, the pellet was discarded, and the  
26 supernatant was preincubated with IP antibody or IgG overnight at 4°C. Protein  
27 A-Sepharose was then added and incubated for another 2 hr at 4°C. The mixtures  
28 were washed three times with RIPA assay buffer, eluted by boiling in 2x Laemmli  
29 buffer, and subjected to western blot analysis with the antibodies accordingly.

30 Western blot was conducted as described previously (Qiu et al., 2013; Wang et al.,  
31 2018). Protein samples were performed on SDS-polyacrylamide gels, and separated  
32 proteins was transferred to Nitrocellulose Membrane (Whatman, GE Healthcare). The  
33 membranes were blocked with 5% BSA in Tris-buffered saline with Tween-20 (TBST)  
34 at room temperature for 2 hr and were incubated with primary antibodies overnight at  
35 4°C. After being washed three times with TBST, the membranes were incubated with  
36 appropriate HRP-linked secondary antibody (1:10000) for 1 hr at room temperature,  
37 followed by detection of the proteins with the chemiluminescence reagent according  
38 to the instructions of the manufacturer. The density of the western blot was measured  
39 with Quantity One under GS-800 Calibrated Densitometer (Bio-Rad).

40 *Extraction of histone proteins*

41 Histone fractionation was performed as described previously with a slightly modified  
42 (Shechter et al., 2007). In brief, nuclear fraction was prepared with Nuclear Extract Kit  
43 (Active Motif) according to the manufacturer's instructions. Re-suspend nuclei in 400  
44  $\mu\text{l}$  0.4N  $\text{H}_2\text{SO}_4$  and incubate on rotator for 2 hr at 4°C. After incubation, samples were  
45 centrifuged at 16,000 g for 10 min at 4°C to remove nuclear debris. Then add 132  $\mu\text{l}$   
46 TCA drop by drop to histone solution and invert the tube several times to mix the  
47 solutions (final concentration of TCA is 33%). Samples were incubated on ice for 1 hr  
48 and centrifuged at 16,000 g for 10 min at 4°C, histone pellet were air-dry for 20 min at  
49 room temperature then re-suspend with appropriate volume of ddH<sub>2</sub>O.

50 *Chromatin immunoprecipitation (ChIP)*

51 ChIP assays were performed using the EZ-ChIP assay kit (Millipore) following the  
52 manufacturer's protocol. Briefly, PC12 cells were transfected with NLS or NLS-APPL1  
53 for 48 hr. Cells were cross-linked with 1% formaldehyde for 10 min at 37 °C.  
54 Crosslinking was stopped with 0.125M glycine. After sonication to yield DNA  
55 fragments of 200-500 base pairs, the lysates were cleared by centrifugation, diluted  
56 6-fold with ChIP dilution buffer, and precleared with salmon sperm DNA/protein  
57 A-agarose at 4°C for 1 hr. 1% input. For each immunoprecipitation assay, the lysates  
58 were incubated with 2  $\mu\text{g}$  of, anti-HDAC2 or control IgG (Thermo Fisher) overnight at  
59 4°C with rotation. The immune-complexes were then collected with protein A-agarose  
60 slurry, eluted, and de-crosslinked at 65 °C. After RNase digestion and proteinase

61 digestion, immunoprecipitated DNA was extracted (QIAGEN). The purified DNA was  
62 amplified by real time qPCR. The relative amounts of mRNA were normalized to  
63 *β-actin* as an internal control, and *hprt1*, an activity-independent gene, was set as a  
64 negative control. Primer sequences were as following (Sequence 5'-3'):

65 *camkIIα*-F, GACCTGGATGCTGACGAAGR; *camkIIα*-R, AGGTGATGGTAGCCAT  
66 CCTG; *bdnf* PI-F, TGATCATCACTCACGACCACG; *bdnf* PI, CAGCCTCTCTGAGCC  
67 AGTTACG; *bdnf* PII-F, TGAGGATAGTGGTGGAGTTG; *bdnf* PII, TAACCTTTTCCTC  
68 CTCC; *bdnf* PIV-F, GCGCGGAATTCTGATTCTGGTAAT R; *bdnf* PIV, GAGAGGGCTC  
69 CACGCTGCCTTGACG; *arc*-F, CAGCATAAATAGCCGCTGGT; *arc*-R, GAGTGT  
70 GGCAGGCTCGTC; *gapdh*-F, CTCCCAGGAAGACCCTGCTT; *gapdh*-R, GGAACAG  
71 GGAGGAGCAGAGA; *c-fos*-F, GAAAGCCTGGGGCGTAGAGT, *c-fos*-R, CC  
72 TCAGCTGGCGCCTTTAT; *homer1*-F, CTGCCTGAGTGTCGTGGAAG; *homer1*-R,  
73 ATGATTTCACTCGCGCTGAC.

#### 74 *HDAC activity assay*

75 HDAC activity was measured using the HDAC2 Immunoprecipitation (IP) & Activity  
76 Assay Kit according to the instructions from the manufacturer (BIOVISION). Briefly,  
77 PC12 cells were transfected with NLS or NLS-APPL1 or 1 μm Trichostatin A (TSA,  
78 MCE). Then immunoprecipitates with anti-HDAC2 in a rotary mixer at 4°C overnight  
79 (IgG was set as negative control), Protein A/G were added into samples for 2hr  
80 incubation at 4°C. HDAC2 assay buffer was added into tube for 2 hr incubation at  
81 room temperature and stopped by adding developer solution. The fluorescence of the

82 substrate was measured after 30 min at 380 nm excitation/500 nm emission using a

83 spectral scanning multimode reader (ThermoFisher Varioskan Flash).

84

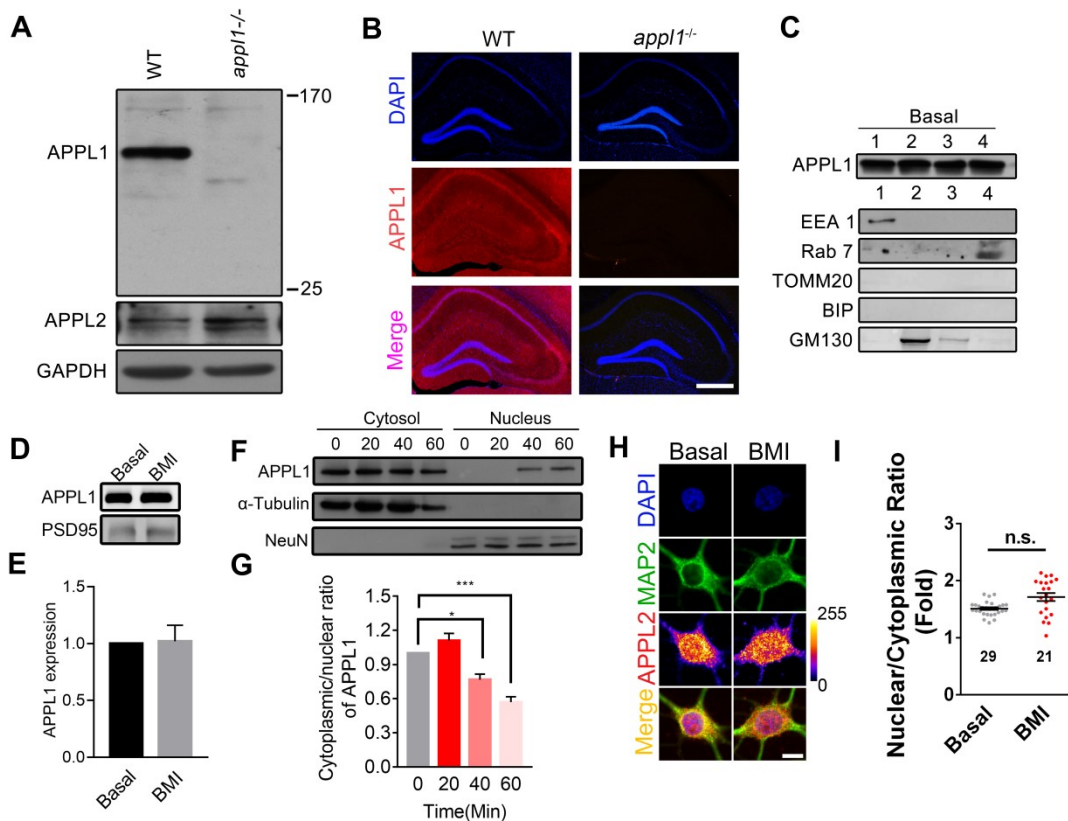

86

87 **Supplementary Figure 1 Neuronal activity has no effect on nuclear**  
 88 **accumulation of APPL2.**

89 **(A)** Hippocampal tissues from wild type (WT) or conventional APPL1 knockout  
 90 (*app1<sup>-/-</sup>*) mice were homogenized and detected by western blot with antibodies  
 91 against APPL1, APPL2, and GAPDH. **(B)** Immunohistochemical staining of APPL1  
 92 and DAPI in hippocampal slices from wild type (WT) or *app1<sup>-/-</sup>* mice. **(C)** Cortical  
 93 neurons were subjected to subcellular fractionation at DIV 10-12. Cells were extracted  
 94 after centrifugation with an Optiprep discontinuous gradient and analyzed by  
 95 immunoblotting with antibodies against EEA1 (Early endosome, Fraction 1), Rab7  
 96 (Late endosome, Fraction 4), TOMM20 (Mitochondria), BIP (Endoplasmic reticulum),

97 GM130 (Golgi, Fraction 2 and 3), and APPL1, respectively. **(D and E)** The abundance  
98 of APPL1 in the cultured cortical neurons after BMI/4-AP treatment for 1 hr. **(F and G)**  
99 The abundance of APPL1 in the cytosolic and nuclear fractions of the cultured cortical  
100 neurons after BMI/4-AP treatment for indicated time. **(H and I)** Hippocampal neurons  
101 at DIV 14-17 were treated with BMI (50  $\mu$ M) for 1 hr and subsequently stained with  
102 anti-MAP2, anti-APPL2 and DAPI nuclear dye. Scale bar, 25  $\mu$ m. Stained APPL2 was  
103 represent by color lookup table. The nuclear/cytoplasmic ratio were quantified. All  
104 data are plotted Mean  $\pm$ SEM. n.s., not significant.

105

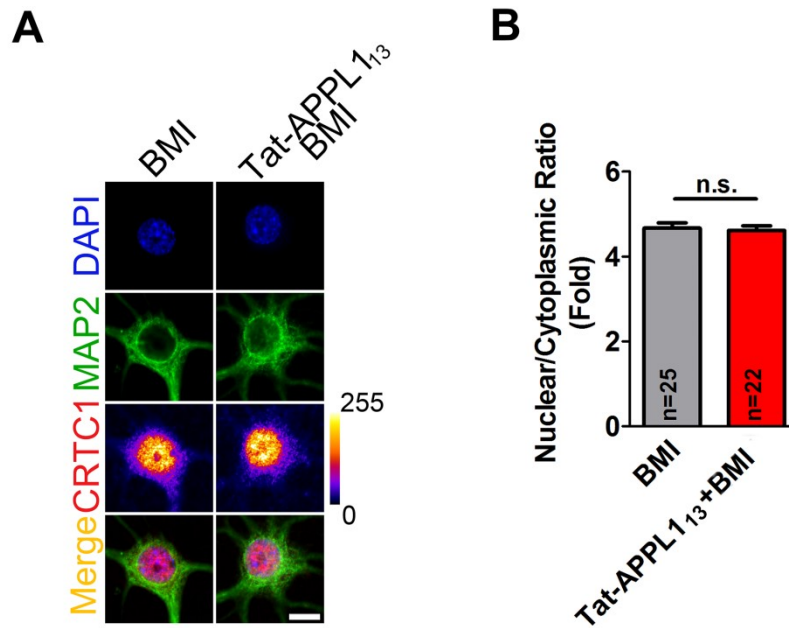

106

107 **Supplementary Figure 2 Pretreatment with Tat-APPL1<sub>NLS</sub> has no effect on**  
 108 **nuclear translocation of CRTC1.**

109 **(A)** Hippocampal neurons at DIV 14-17 were pretreated with Tat-APPL1<sub>13</sub> (20 μM) and  
 110 subsequently treated with BMI (50 μM) for 1 hr, followed by staining with anti-MAP2,  
 111 anti-CRTC1 and DAPI nuclear dye. Scale bar, 25 μm. Stained CRTC1 was represent  
 112 by color lookup table. **(B)** The nuclear/cytoplasmic ratio were quantified. All data are  
 113 plotted Mean ±SEM. n.s., not significant.

114



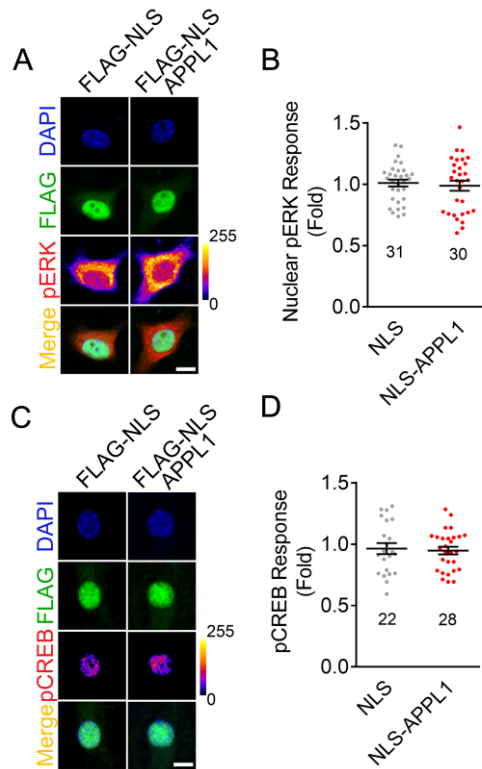

115

116 **Supplementary Figure 3 Nuclear accumulation of APPL1 has no effect on**  
 117 **nuclear ERK/CREB activity.**

118 **(A and B)** Hippocampal neurons transfected with FLAG-NLS or FLAG-NLS-APPL1  
 119 were labeled with antibodies against FLAG (green) and pERK (color lookup table) and  
 120 with DAPI. The fluorescence intensity of nuclear pERK was then quantified.  
 121 Scale bar = 10  $\mu$ m. **(C and D)** Neurons transfected with FLAG-NLS or  
 122 FLAG-NLS-APPL1 were labeled with antibodies against FLAG (green) and pCREB  
 123 (color lookup table) and with DAPI (blue). The fluorescence intensity of pCREB was  
 124 then quantified. Scale bar = 10  $\mu$ m.

125

126

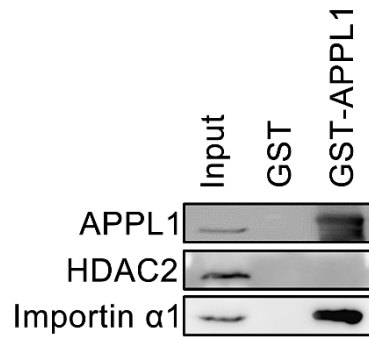

127

128 **Supplementary Figure 4 APPL1 has no direct interaction with HDAC2.**

129 Mouse brain extracts were incubated with recombinant GST or GST-APPL1 for 3 hr at

130 4°C. Binding proteins were detected using antibodies against Importin  $\alpha$ 1 and HDAC2,

131 respectively.

132

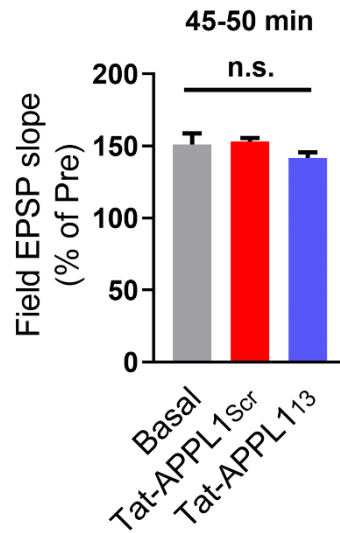

133

134 **Supplementary Figure 5 Tat-APPL1<sub>13</sub> has no effect on the early phase of L-LTP.**

135 L-LTP was induced by 4 trains of tetanic stimulation (3 min apart), and perfusion with

136 Tat-APPL1<sub>13</sub> (n = 8 slices, 8 mice) or with Tat-APPL1<sub>scr</sub> (n = 6 slices, 6 mice) has no

137 effect on the initial phase of L-LTP (40-50 min after induction of L-LTP) compared to

138 basal group (n = 7 slices, 7 mice). Data are presented as means  $\pm$  SEM.

139

140 **Supplementary References**

141 Qiu, S., Chen, T., Koga, K., et al. (2013). An increase in synaptic NMDA receptors in  
142 the insular cortex contributes to neuropathic pain. *Sci Signal* 6, ra34.

143 Qiu, S., Zhang, M., Liu, Y., et al. (2014). GluA1 phosphorylation contributes to  
144 postsynaptic amplification of neuropathic pain in the insular cortex. *J Neurosci*  
145 34, 13505-13515.

146 Shechter, D., Dormann, H.L., Allis, C.D., et al. (2007). Extraction, purification and  
147 analysis of histones. *Nat Protoc* 2, 1445-1457.

148 Wang, J., Lv, X., Wu, Y., et al. (2018). Postsynaptic RIM1 modulates synaptic function  
149 by facilitating membrane delivery of recycling NMDARs in hippocampal  
150 neurons. *Nat Commun* 9, 2267.

151
